# Supplementary material
Source: publisher figshare collection journal article supplement (https://diabetesjournals.figshare.com/ndownloader/files/32606762)
Supplement: Supplementary file 1 [file 32606762]

Supplemental Table 7. SNP association with year 1 change in WCadjBMI in lifestyle interventions in African American participants
Marker	rs number		k	beta	se	lower	upper	Z	pval	I2	pval.Q		bon_p	fdr_p
snp1	rs2645294		2	0.007	0.012	-0.018	0.031	0.537	0.592	0.322	0.224		1	0.99
snp2	rs905938		2	0.005	0.015	-0.024	0.034	0.321	0.749	0.187	0.267		1	0.99
snp3	rs10919388		2	0.004	0.013	-0.023	0.03	0.269	0.788	0.075	0.299		1	0.99
snp4	rs714515		2	0.001	0.017	-0.032	0.034	0.054	0.957	0	0.674		1	0.99
snp5	rs2820443		2	0.006	0.025	-0.043	0.055	0.243	0.808	0	0.485		1	0.99
snp6	rs1385167		2	0.024	0.015	-0.005	0.053	1.602	0.109	0.439	0.182		1	0.99
snp7	rs10195252		2	0.009	0.013	-0.017	0.035	0.683	0.495	0	0.729		1	0.99
snp8	rs1569135		2	-0.002	0.013	-0.027	0.024	-0.125	0.9	0.033	0.309		1	0.99
snp9	rs17819328		2	0.02	0.015	-0.009	0.05	1.35	0.177	0.39	0.2		1	0.99
snp10	rs2276824		2	0.018	0.014	-0.009	0.045	1.309	0.191	0	0.876		1	0.99
snp11	rs2371767		2	-0.003	0.012	-0.027	0.021	-0.23	0.818	0.692	0.072		1	0.99
snp12	rs10804591		2	0.018	0.012	-0.007	0.042	1.428	0.153	0.766	0.039		1	0.99
snp13	rs17451107		2	-0.003	0.013	-0.028	0.023	-0.205	0.838	0	0.778		1	0.99
snp14	rs3805389		2	-0.004	0.016	-0.037	0.028	-0.27	0.787	0	0.528		1	0.99
snp15	rs9991328		2	0.011	0.013	-0.014	0.036	0.843	0.399	0	0.898		1	0.99
snp16	rs303084		2	0.005	0.012	-0.019	0.03	0.438	0.662	0	0.906		1	0.99
snp17	rs9687846		2	0.015	0.015	-0.013	0.044	1.046	0.296	0.233	0.253		1	0.99
snp18	rs1045241		2	-0.002	0.013	-0.028	0.025	-0.135	0.893	0	0.958		1	0.99
snp19	rs7705502		2	0.03	0.021	-0.012	0.072	1.399	0.162	0	0.526		1	0.99
snp20	rs6556301		2	0.004	0.014	-0.025	0.032	0.249	0.803	0	0.95		1	0.99
snp21	rs1294410		2	0.006	0.015	-0.023	0.034	0.378	0.706	0	0.782		1	0.99
snp22	rs7759742		1	0.008	0.018	-0.027	0.043	0.434	0.664	NA	NA		1	0.99
snp23	rs1776897		2	0.004	0.013	-0.021	0.03	0.344	0.731	0	0.363		1	0.99
snp24	rs1358980		2	0.003	0.015	-0.027	0.032	0.178	0.859	0.41	0.193		1	0.99
snp25	rs1936805		2	-0.017	0.013	-0.043	0.01	-1.232	0.218	0	0.59		1	0.99
snp26	rs10245353		2	0.001	0.027	-0.052	0.054	0.022	0.982	0	0.93		1	0.99
snp27	rs7801581		2	0.002	0.015	-0.028	0.031	0.108	0.914	0	0.892		1	0.99
snp28	rs7830933		2	-0.014	0.014	-0.042	0.014	-0.992	0.321	0.355	0.213		1	0.99
snp29	rs12679556		2	-0.009	0.013	-0.034	0.016	-0.691	0.489	0	0.886		1	0.99
snp30	rs10991437		2	0.009	0.031	-0.051	0.069	0.29	0.772	0	0.697		1	0.99
snp31	rs7917772		2	0.018	0.014	-0.009	0.044	1.294	0.196	0.577	0.124		1	0.99
snp32	rs11231693		2	0.024	0.016	-0.007	0.054	1.516	0.129	0	0.417		1	0.99
snp33	rs10842707		2	-0.008	0.023	-0.053	0.037	-0.34	0.734	0	0.499		1	0.99
snp34	rs1443512		2	-0.006	0.012	-0.03	0.018	-0.476	0.634	0.127	0.284		1	0.99
snp35	rs4765219		2	0.003	0.013	-0.023	0.03	0.239	0.811	0	0.599		1	0.99
snp36	rs8042543		2	0.007	0.023	-0.039	0.052	0.283	0.777	0	0.946		1	0.99
snp37	rs8030605		2	-0.002	0.023	-0.047	0.042	-0.109	0.913	0	0.631		1	0.99
snp38	rs1440372		2	0.006	0.018	-0.03	0.042	0.318	0.75	0	0.364		1	0.99
snp39	rs2925979		2	-0.041	0.013	-0.067	-0.015	-3.119	0.002	0.5	0.157		0.107	0.107
snp40	rs4646404		2	0.013	0.021	-0.028	0.054	0.637	0.524	0	0.405		1	0.99
snp41	rs8066985		2	-0.004	0.013	-0.029	0.021	-0.329	0.742	0	0.394		1	0.99
snp42	rs12454712		2	0.024	0.015	-0.005	0.053	1.637	0.102	0	0.946		1	0.99
snp43	rs12608504		2	0	0.013	-0.025	0.026	0.028	0.978	0	0.557		1	0.99
snp44	rs4081724		2	-0.005	0.029	-0.063	0.052	-0.183	0.855	0.535	0.143		1	0.99
snp45	rs979012		2	-0.005	0.013	-0.03	0.02	-0.402	0.687	0.921	0		1	0.99
snp46	rs224333		2	0.001	0.017	-0.033	0.035	0.058	0.954	0	0.367		1	0.99
snp47	rs6090583		2	-0.002	0.013	-0.028	0.024	-0.117	0.907	0	0.954		1	0.99
snp48	rs2294239		2	-0.03	0.015	-0.06	0	-1.944	0.052	0	0.807		1	0.99
snp49	rs1534696		2	0.011	0.013	-0.014	0.037	0.884	0.376	0.095	0.293		1	0.99
snp50	rs10925060		1	-0.012	0.026	-0.063	0.04	-0.436	0.663	NA	NA		1	0.99
snp51	rs2124969		2	0.001	0.022	-0.041	0.044	0.063	0.95	0	0.662		1	0.99
snp52	rs1664789		2	-0.02	0.015	-0.049	0.01	-1.315	0.188	0	0.79		1	0.99
snp53	rs17472426		2	0.019	0.044	-0.068	0.106	0.427	0.669	0	0.701		1	0.99
snp54	rs1144		2	-0.011	0.015	-0.04	0.018	-0.729	0.466	0	0.818		1	0.99
snp55	rs178420		1	0.016	0.019	-0.022	0.053	0.82	0.412	NA	NA		1	0.99
snp56	rs2047937		2	-0.01	0.012	-0.034	0.014	-0.792	0.428	0.465	0.171		1	0.99
snp57	rs2398893		2	-0.007	0.013	-0.032	0.017	-0.574	0.566	0	0.614		1	0.99
snp58	rs1394461		1	-0.015	0.036	-0.085	0.056	-0.402	0.688	NA	NA		1	0.99
snp59	rs319564		2	0	0.013	-0.026	0.027	0.012	0.99	0	0.489		1	0.99
